# Supplementary material
Source: publisher site journal article supplement (https://www.dovepress.com/article/435732)
Supplement: Supplementary file 1 [file get_supplementary_file.php]

**Supplementary File 1** The list of immune genes retrieved from the ImmPort database for this study.

| **Immune genes** | AZGP1 B2M CALR CANX CD1A CD1B CD1C CD1D CD1E CD4 CD8A CD8B CD74 CREB1 CTSB CTSE CTSL CTSS FCER1G FCGRT PDIA3 HFE HLA-A HLA-B HLA-C HLA-DMA HLA-DMB HLA-DOA HLA-DOB HLA-DPA1 HLA-DPB1 HLA-DQA1 HLA-DQA2 HLA-DQB1 HLA-DRA HLA-DRB1 HLA-DRB3 HLA-DRB4 HLA-DRB5 HLA-E HLA-F HLA-G HLA-H MR1 HSPA1A HSPA1B HSPA1L HSPA2 HSPA4 HSPA5 HSPA6 HSPA8 HSP90AA1 HSP90AB1 ICAM1 IFNA1 IFNA2 IFNA4 IFNA5 IFNA6 IFNA7 IFNA8 IFNA10 IFNA13 IFNA14 IFNA16 IFNA17 IFNA21 IFNG KIR2DL1 KIR2DL2 KIR2DL3 KIR2DL4 KIR2DS1 KIR2DS3 KIR2DS4 KIR2DS5 KIR3DL1 KIR3DL2 KLRC1 KLRC2 KLRC3 KLRD1 LTA CIITA MICA MICB NFYA NFYB NFYC LGMN PSMB8 PSMC1 PSMC2 PSMC3 PSMC4 PSMC5 PSMC6 PSMD1 PSMD2 PSMD3 PSMD4 PSMD5 PSMD7 PSMD8 PSMD10 PSMD11 PSMD13 PSME1 PSME2 RELB RFX5 RFXAP SLC10A2 TAP1 TAP2 TAPBP THBS1 SEM1 KLRC4 AP3B1 RFXANK PSMD6 PSME3 PSMD14 CLEC4M IFI30 PROCR ADRM1 ECPAS TRPC4AP CD209 UBXN1 ERAP1 TAPBPL KIR2DL5A ERAP2 ULBP3 ULBP2 ULBP1 KIR3DL3 RAET1E RAET1L UBR1 RAET1G PDIA2 HAMP PI3 CAMP DEFB4A PPBP REG3G CXCL14 CXCL16 SLPI CXCL8 CXCL10 CXCL9 CXCL5 CXCL11 CXCL6 CXCL1 CXCL12 CXCL13 CXCL2 PF4 XCL1 CXCL3 DEFB103B CCL13 CCL1 DEFB1 CCL8 ELANE DEFB103A DEFA3 DEFA1 TMSB10 DEFA6 DEFA5 DEFA4 LCN2 LCN1 COLEC10 BPI S100A9 S100A8 DCD LCN6 S100A12 HTN3 LCN8 DEFA1B CCR10 CELA1 DEFB106A PENK BPIFC MMP12 BPIFB6 LEAP2 SFTPD LCN9 BPIFB2 PTGDS TMSB4X PGLYRP1 ZC3HAV1 TMSB15A S100B S100A13 S100A6 DEFB119 DEFB107A DEFB105A SERPIND1 DEFB129 DEFB127 S100P S100A7 DEFB104A DEFB126 DEFB106B DEFB104B DEFB107B PGLYRP3 PGLYRP2 S100A10 S100A2 DEFB125 DEFB123 DEFB105B DEFB132 BPIFB3 LCN12 PGLYRP4 S100A11 S100A5 S100A3 S100A1 DEFB128 DEFB108B HTN1 LMBR1L S100A7A DEFB118 COLEC12 TMSB4Y DEFB131A DEFB134 DEFB130A DEFB124 DEFB121 DEFB116 DEFB115 DEFB114 DEFB113 DEFB112 DEFB110 TMSB15B DEFB133 S100Z MAVS TMSB4XP8 S100A14 LCN10 S100A16 DEFB136 DEFB135 DEFB117 ZC3HAV1L S100A7L2 MBL3P DEFB4B BPIFB4 IFNAR1 AZU1 DEFB131B DEFA1A3 LCN1P1 S100G DEFA7P DEFB130B DEFB108F DEFB131C TCHHL1 TINAGL1 IFNGR1 SLC22A17 WFIKKN1 WFDC2 IL6 UMODL1 TGFB1 PF4V1 MMP9 ANOS1 TLR4 SPAG11B A2M NFKB1 APOBEC3G FABP6 NOD2 MBL2 SFTPA1 RBP1 TLR2 SLC40A1 PLAU IL1B PAEP HJV MUC5AC OBP2A PLTP MX1 DDX58 IFNL1 IRF3 SFTPA2 LPA LBP RBP4 NOX4 LTF IFNB1 RBP5 FABP7 FABP5 FABP3 FABP2 FABP4 R3HDML BPIFA3 BPIFB1 OASL CRABP2 CRABP1 RBP7 DUOX1 OBP2B RBP2 LCN15 CETP FABP12 FABP9 BPIFA1 LCNL1 C8G SPAG11A PI15 NOX1 PMP2 APOD ORM2 ORM1 TNF CTSG PRTN3 MAPK1 PML AEN CYBB BPIFA2 ISG20 BCL3 ISG20L2 NOX5 NOX3 DUOX2 TLR3 TFRC IFIH1 LRP1 TRIM5 IDO1 GDF15 NEDD4 ADIPOQ STAT3 STAT1 IFNL2 SOCS3 SEMG1 TNFSF10 CCL20 SOCS1 RNASEL IRF1 IL15 APOBEC3F PLAAT4 CHIT1 CD40 TLR7 PPIA ZYX NLRX1 PGC VEGFA IKBKE ISG15 DHX58 TNFAIP3 TFR2 FCN2 MUC4 F2R ELN IL27 MAPT LYZ CCL5 LEP CYLD KLKB1 CST4 CSRP1 MAPK14 JUN ITGAV IRF5 CCR6 IL12B TLR8 GNLY CD81 EIF2AK2 APOM CACYBP NOD1 MAPK8 MAPK3 BST2 BPHL PLA2G2A GRN NEWENTRY PDGFRA GNAI1 WNT5A FURIN ADAR TYK2 NOS2 TRAF3 TPT1 TPM2 NEO1 AHNAK TLR1 TK2 PRDX2 MX2 FGF2 FGA TCF7L2 F2RL1 TKFC MSR1 NFKBIZ LMBR1 EPPIN SRC MPO ELAVL1 ROBO3 SP1 SOD1 PDF DLL4 ECD SLC11A1 DMBT1 STING1 SKIV2L SEMG2 DES DCK DAXX TNFRSF10A TNFRSF10B EED CCL4 LIMS1 LALBA APOBEC3H TMPRSS6 SPINK5 MARCO BECN1 TNFSF11 KNG1 CSK KLRK1 KCNH2 JUND JAK1 CLDN4 CCL28 RNASE3 RN7SL1 IRF7 IREB2 ILK IL18 IL17A LTB4R APOBEC3A MASP2 TRIM27 RELA IL7R IL1A PTX3 IFNAR2 IFN1@ SYTL1 APOBEC3C DDX17 PTGS2 HTR1A SEPTIN7 CD40LG CD14 MASP1 PROC MAP2K2 MAP2K1 HRG NDRG1 IRF9 TRIM22 LANCL1 PPP4C HMOX1 HMGB1 RNASE7 ABCC4 HGF HDAC1 IFNLR1 PLSCR1 BACH2 TANK PIK3CG ARRB1 RSAD2 STAB2 TBK1 PDYN PDGFRB PDCD1 PCSK2 PCSK1 ARG2 AQP9 FASLG APOH BIRC5 ANXA6 IL22 VTN VIM VCAM1 PRDX1 GFAP GBP2 ALB SLC29A3 OAS1 AGER UNC93B1 TNFSF4 NOS1 ACTG1 ACTA1 ACO1 SERPINA3 CXCR1 CCL15 CCL14 CCL16 CCL19 CCL18 CCL17 CCL26 CCL22 CCR3 CCL4L1 ACKR2 CCR7 CCL27 CCR8 ACKR4 CCL2 CCL21 CCL7 CCL3 CCL11 CCR5 CCL23 CCL25 CCL3L3 CCL4L2 CCL3L1 CCR1 CCL24 XCL2 CXCR4 CXCR6 CCR4 TAFA5 TAFA3 TAFA4 TAFA1 TAFA2 CCL15-CCL14 PTK2B IL4 CDH1 LTBP1 IL13 IL10 IL2 PPARG FGR MIF CRP JAK2 PTK2 PTGDR CD86 HCK VDR OLR1 GRK2 TXK RNASE2 CD79A CD79B LYN SYK BTK BLNK VAV3 VAV1 VAV2 RAC1 RAC2 RAC3 PPP3CA PPP3CB PPP3CC CHP1 PPP3R1 PPP3R2 CHP2 NFAT5 NFATC1 NFATC2 NFATC3 NFATC4 HRAS KRAS NRAS FOS CARD11 BCL10 MALT1 CHUK IKBKB IKBKG NFKBIA NFKBIB NFKBIE CD19 CR2 PIK3R5 PIK3R1 PIK3R2 PIK3R3 PIK3CA PIK3CB PIK3CD AKT3 AKT1 AKT2 GSK3B INPP5D CD22 CD72 PTPN6 LILRB3 FCGR2B RASGRP3 PLCG2 PRKCB IFITM1 IGH IGHA1 IGHA2 IGHD IGHD1-1 IGHD1-14 IGHD1-20 IGHD1-26 IGHD1-7 IGHD2-15 IGHD2-2 IGHD2-21 IGHD2-8 IGHD3-10 IGHD3-16 IGHD3-22 IGHD3-3 IGHD3-9 IGHD4-11 IGHD4-17 IGHD4-23 IGHD4-4 IGHD5-12 IGHD5-18 IGHD5-24 IGHD5-5 IGHD6-13 IGHD6-19 IGHD6-25 IGHD6-6 IGHD7-27 IGHE IGHG1 IGHG2 IGHG3 IGHG4 IGHJ1 IGHJ2 IGHJ3 IGHJ4 IGHJ5 IGHJ6 IGHM IGHV1-18 IGHV1-2 IGHV1-24 IGHV1-3 IGHV1-45 IGHV1-46 IGHV1-58 IGHV1-69 IGHV1-8 IGHV1-38-4 IGHV1-69-2 IGHV2-26 IGHV2-5 IGHV2-70 IGHV3-11 IGHV3-13 IGHV3-15 IGHV3-16 IGHV3-20 IGHV3-21 IGHV3-23 IGHV3-30 IGHV3-30-3 IGHV3-30-5 IGHV3-33 IGHV3-35 IGHV3-38 IGHV3-43 IGHV3-48 IGHV3-49 IGHV3-53 IGHV3-64 IGHV3-66 IGHV3-7 IGHV3-72 IGHV3-73 IGHV3-74 IGHV3-9 IGHV3-38-3 IGHV3-69-1 IGHV4-28 IGHV4-30-1 IGHV4-30-2 IGHV4-30-4 IGHV4-31 IGHV4-34 IGHV4-39 IGHV4-4 IGHV4-59 IGHV4-61 IGHV4-38-2 IGHV5-51 IGHV5-10-1 IGHV6-1 IGHV7-4-1 IGHV7-81 IGK IGKC IGKDEL IGKJ IGKJ1 IGKJ2 IGKJ3 IGKJ4 IGKJ5 IGKV@ IGKV1-12 IGKV1-13 IGKV1-16 IGKV1-17 IGKV1-27 IGKV1-33 IGKV1-37 IGKV1-39 IGKV1-5 IGKV1-6 IGKV1-8 IGKV1-9 IGKV1D-12 IGKV1D-13 IGKV1D-16 IGKV1D-17 IGKV1D-33 IGKV1D-37 IGKV1D-39 IGKV1D-42 IGKV1D-43 IGKV1D-8 IGKV2-24 IGKV2-28 IGKV2-30 IGKV2-40 IGKV2D-24 IGKV2D-28 IGKV2D-29 IGKV2D-30 IGKV2D-40 IGKV3-11 IGKV3-15 IGKV3-20 IGKV3-7 IGKV3D-11 IGKV3D-15 IGKV3D-20 IGKV3D-7 IGKV4-1 IGKV5-2 IGKV6-21 IGKV6D-21 IGKV6D-41 IGL IGLC1 IGLC2 IGLC3 IGLC6 IGLC7 IGLJ IGLJ1 IGLJ2 IGLJ3 IGLJ4 IGLJ5 IGLJ6 IGLJ7 IGLV@ IGLV1-36 IGLV1-40 IGLV1-44 IGLV1-47 IGLV1-50 IGLV1-51 IGLV10-54 IGLV11-55 IGLV2-11 IGLV2-14 IGLV2-18 IGLV2-23 IGLV2-33 IGLV2-8 IGLV3-1 IGLV3-10 IGLV3-12 IGLV3-16 IGLV3-19 IGLV3-21 IGLV3-22 IGLV3-25 IGLV3-27 IGLV3-32 IGLV3-9 IGLV4-3 IGLV4-60 IGLV4-69 IGLV5-37 IGLV5-39 IGLV5-45 IGLV5-48 IGLV5-52 IGLV6-57 IGLV7-43 IGLV7-46 IGLV8-61 IGLV9-49 C3 C5 CCL3P1 CKLF CMA1 CX3CL1 CXCL17 CCN1 EDN1 EDN2 EDN3 FGF10 LECT2 PPBPP1 PROK2 SAA1 SAA2 SBDS SEMA3A SEMA3B SEMA3C SEMA3D SEMA3E SEMA3F SEMA3G SEMA4A SEMA4B SEMA4C SEMA4D SEMA4F SEMA4G SEMA5A SEMA5B SEMA6A SEMA6B SEMA6C SEMA6D SEMA7A SLIT1 SLIT2 TNC TYMP C5AR1 CCR9 CCRL2 CMKLR1 CX3CR1 CXCR3 CXCR5 ACKR3 CYSLTR1 CYSLTR2 ACKR1 EDNRA EDNRB FPR1 FPR2 GPR17 GPR32 GPR33 PTGDR2 C5AR2 CXCR2 LTB4R2 PLAUR PLXNA1 PLXNA2 PLXNA3 PLXNA4 PLXNB1 PLXNB2 PLXNB3 PLXNC1 PLXND1 PTAFR ROBO1 ROBO2 RXFP3 XCR1 ADM ADM2 AGRP AGT AMBN AMELX AMH ANGPTL5 ANGPTL7 APLN AREG MANF CDNF ARTN AVP BDNF BMP1 BMP10 BMP15 BMP2 BMP3 BMP4 BMP5 BMP6 BMP7 BMP8A BMP8B BTC MYDGF CALCA CALCB CAT CCK CD320 CD70 ADA2 CER1 CGA CGB3 CGB1 CGB2 CGB5 CGB7 CGB8 CHGA CHGB CLCF1 CLEC11A CMTM1 CMTM2 CMTM3 CMTM4 CMTM5 CMTM6 CMTM7 CMTM8 CNTF CORT CRH CSF1 CSF2 CSF3 CSH1 CSH2 CSHL1 CSPG5 CTF1 CCN2 DKK1 EBI3 EGF EPGN EPO EREG ESM1 FAM3B FAM3C FAM3D FGF1 FGF11 FGF12 FGF13 FGF14 FGF16 FGF17 FGF18 FGF19 FGF20 FGF21 FGF22 FGF23 FGF3 FGF4 FGF5 FGF6 FGF7 FGF8 FGF9 VEGFD FIGNL2 FLT3LG FSHB GAL GALP GAST GCG GDF1 GDF10 GDF11 GDF2 GDF3 GDF5 GDF6 GDF7 GDF9 GDNF GH1 GH2 GHRH GHRL GIP GKN1 GMFB GMFG GNRH1 GNRH2 GPHA2 GPHB5 GPI GREM1 GREM2 GRP GUCA2A HBEGF HDGF HDGFL3 IAPP IFNE IFNK IFNW1 IGF1 IGF2 IL11 IL12A IL16 IL17B IL17C IL17D IL17F IL19 IL1F10 IL36RN IL36A IL37 IL36B IL36G IL1RN IL20 IL21 IL23A IL24 IL25 IL26 IFNL3 IL3 IL31 IL32 IL33 IL34 IL5 IL6ST IL7 IL9 INHA INHBA INHBB INHBC INHBE INS INS-IGF2 INSL3 INSL4 INSL5 INSL6 JAG1 JAG2 FGF7P6 FGF7P3 KITLG KL LACRT LEFTY1 LEFTY2 LHB LIF LRSAM1 LTB LTBP2 LTBP3 LTBP4 MDK MIA MLN MSTN NAMPT NDP NENF NGF NMB NODAL CCN3 NPFF NPPA NPPB NPPC NPY NRG1 NRG2 NRG3 NRG4 NRTN NTF3 NTF4 NTS NUDT6 OGN OSGIN1 OSM OSTN OXT ENDOU PDGFA PDGFB PDGFC PDGFD PDGFRL PGF PMCH PNOC POMC PPBPP2 PPY PRL PRLH PROK1 PSPN PTH PTH2 PTHLH PTN PYY QRFP RABEP1 RABEP2 REG1A RETN RETNLB RLN1 RLN2 RLN3 SCG2 SCGB3A1 SCT AIMP1 SECTM1 SLURP1 SPP1 SST STC1 STC2 TAC1 TDGF1 TDGF1P3 TG TGFA TGFB2 TGFB3 THPO TNFRSF11B TNFSF12 TNFSF13 TNFSF13B TNFSF14 TNFSF15 TNFSF18 TNFSF8 TNFSF9 TOR2A TRH TSHB TSLP TXLNA UCN UCN2 UCN3 UTS2 UTS2B VEGFB VEGFC VGF VIP ACVR1B ACVR1C ACVR2A ACVR2B ACVRL1 ADCYAP1R1 ADIPOR1 ADIPOR2 ADRB1 ADRB2 AGTR1 AGTR2 AMHR2 ANGPT1 ANGPT4 ANGPTL1 ANGPTL2 ANGPTL3 ANGPTL4 ANGPTL6 APLNR AR AVPR1A AVPR1B AVPR2 BMPR1A BMPR1B BMPR2 BRD8 C3AR1 CALCR CALCRL CNTFR CRHR1 CRHR2 CRIM1 CRLF1 CRLF2 CRLF3 CSF1R CSF2RA CSF2RB CSF3R EGFR ENG EPOR ESR1 ESR2 ESRRA ESRRB ESRRG FGFR1 FGFR2 FGFR3 FGFR4 FGFRL1 FLT1 FLT3 FLT4 FSHR GALR2 GALR3 GCGR GHR GHRHR GHSR GIPR GLP1R GLP2R GNRHR GPER1 HNF4A HNF4G HTR3A HTR3B HTR3C HTR3D HTR3E IFNGR2 IGF1R IGF2R IL10RA IL10RB IL11RA IL12RB1 IL12RB2 IL13RA1 IL13RA2 IL15RA IL2RB IL17RA IL17RB IL17RC IL17RD IL17RE IL18R1 IL18RAP IL1R1 IL1R2 IL1RAP IL1RL1 IL1RL2 IL20RA IL20RB IL21R IL22RA1 IL22RA2 IL23R IL27RA IL2RA IL2RG IL31RA IL3RA IL4R IL5RA IL6R IL9R INSR KDR LEPR LGR4 LGR5 LGR6 LHCGR LIFR LTBR MC1R MC2R MC3R MC4R MCHR1 MCHR2 MET MLNR MPL MTNR1A MTNR1B NGFR NMBR NPR1 NPR3 NR0B1 NR0B2 NR1D1 NR1D2 NR1H2 NR1H3 NR1H4 NR1I2 NR1I3 NR2C1 NR2C2 NR2E1 NR2E3 NR2F1 NR2F2 NR2F6 NR3C1 NR3C2 NR4A1 NR4A2 NR4A3 NR5A1 NR5A2 NR6A1 NRP1 NRP2 OGFR OPRD1 OPRK1 OPRL1 OPRM1 OSMR OXTR PGR PGRMC2 PPARA PPARD PRLHR PRLR PTGER1 PTGER2 PTGER3 PTGER4 PTGFR PTH1R PTH2R RARA RARB RARG RORA RORB RORC RXFP1 RXFP2 RXRA RXRB RXRG S1PR1 S1PR2 SCTR SDC1 SDC2 SDC3 SDC4 SORT1 SSTR1 SSTR2 SSTR5 ST2 TACR1 TEK TGFBR1 TGFBR2 TGFBR3 THRA THRB TIE1 TNFRSF10C TNFRSF10D TNFRSF11A TNFRSF12A TNFRSF13B TNFRSF13C TNFRSF14 TNFRSF17 TNFRSF18 TNFRSF19 TNFRSF1A TNFRSF1B TNFRSF21 TNFRSF25 TNFRSF4 TNFRSF6B TNFRSF8 TNFRSF9 TRHR TSHR TUBB3 VIPR1 VIPR2 PTPN11 ICAM2 ITGAL ITGB2 PAK1 NCR2 TYROBP LCK FCGR3A FCGR3B NCR1 NCR3 CD247 ZAP70 LCP2 LAT PLCG1 SH3BP2 FYN SHC2 SHC4 SHC3 SHC1 GRB2 SOS1 SOS2 ARAF BRAF RAF1 HCST CD48 CD244 PRKCA PRKCG SH2D1B SH2D1A FAS GZMB PRF1 CASP3 BID CD3D CD3E CD3G PTPRC ITK TEC NCK1 NCK2 GRAP2 PAK2 PAK3 PAK4 PAK6 PAK5 RHOA CDC42 CD28 ICOS MAP3K8 MAP3K14 CTLA4 CBLC CBL CBLB CDK4 RASGRP1 PDK1 PRKCQ TRAC TRAJ1 TRAJ2 TRAJ3 TRAJ4 TRAJ5 TRAJ6 TRAJ7 TRAJ8 TRAJ9 TRAJ10 TRAJ11 TRAJ12 TRAJ13 TRAJ14 TRAJ15 TRAJ16 TRAJ17 TRAJ18 TRAJ19 TRAJ20 TRAJ21 TRAJ22 TRAJ23 TRAJ24 TRAJ25 TRAJ26 TRAJ27 TRAJ28 TRAJ29 TRAJ30 TRAJ31 TRAJ32 TRAJ33 TRAJ34 TRAJ35 TRAJ36 TRAJ37 TRAJ38 TRAJ39 TRAJ40 TRAJ41 TRAJ42 TRAJ43 TRAJ44 TRAJ45 TRAJ46 TRAJ47 TRAJ48 TRAJ49 TRAJ50 TRAJ52 TRAJ53 TRAJ54 TRAJ56 TRAJ57 TRAJ58 TRAJ59 TRAJ61 TRAV1-1 TRAV1-2 TRAV2 TRAV3 TRAV4 TRAV5 TRAV7 TRAV8-1 TRAV8-2 TRAV8-3 TRAV8-4 TRAV8-6 TRAV8-7 TRAV9-1 TRAV9-2 TRAV10 TRAV12-1 TRAV12-2 TRAV12-3 TRAV13-1 TRAV13-2 TRAV14DV4 TRAV16 TRAV17 TRAV18 TRAV19 TRAV20 TRAV21 TRAV22 TRAV23DV6 TRAV24 TRAV25 TRAV26-1 TRAV26-2 TRAV27 TRAV29DV5 TRAV30 TRAV34 TRAV35 TRAV36DV7 TRAV38-1 TRAV38-2DV8 TRAV39 TRAV40 TRAV41 TRBC1 TRBC2 TRBD1 TRBD2 TRBJ1-1 TRBJ1-2 TRBJ1-3 TRBJ1-4 TRBJ1-5 TRBJ1-6 TRBJ2-1 TRBJ2-2 TRBJ2-3 TRBJ2-4 TRBJ2-5 TRBJ2-6 TRBJ2-7 TRBV2 TRBV3-1 TRBV4-1 TRBV4-2 TRBV4-3 TRBV5-1 TRBV5-4 TRBV5-5 TRBV5-6 TRBV5-7 TRBV5-8 TRBV6-1 TRBV6-2 TRBV6-3 TRBV6-4 TRBV6-5 TRBV6-6 TRBV6-7 TRBV6-8 TRBV6-9 TRBV7-2 TRBV7-3 TRBV7-4 TRBV7-6 TRBV7-7 TRBV7-8 TRBV7-9 TRBV9 TRBV10-1 TRBV10-2 TRBV10-3 TRBV11-1 TRBV11-2 TRBV11-3 TRBV12-3 TRBV12-4 TRBV12-5 TRBV13 TRBV14 TRBV15 TRBV16 TRBV17 TRBV18 TRBV19 TRBV20-1 TRBV24-1 TRBV25-1 TRBV27 TRBV28 TRBV29-1 TRBV30 TRDC TRDD1 TRDD2 TRDD3 TRDJ1 TRDJ2 TRDJ3 TRDJ4 TRDV1 TRDV2 TRDV3 TRGV9 TRGV8 TRGV5 TRGV4 TRGV3 TRGV2 TRGJP2 TRGJP1 TRGJP TRGJ2 TRGJ1 TRGC2 TRGC1 TRAV6 |
| --- | --- |

**Supplementary File 2** The −log(p-value) and Z-score of differentially expressed genes (DEGs) in the Ingenuity Canonical Pathways.

| Ingenuity Canonical Pathways | -log(p-value) | Ratio | z-score |
| --- | --- | --- | --- |
| Superpathway of Inositol Phosphate Compounds | 5.40E+00 | 2.71E-01 | -3.051 |
| 3-phosphoinositide Degradation | 5.33E+00 | 2.83E-01 | -3.202 |
| 3-phosphoinositide Biosynthesis | 5.01E+00 | 2.74E-01 | -3.429 |
| D-myo-inositol-5-phosphate Metabolism | 4.39E+00 | 2.67E-01 | -2.655 |
| D-myo-inositol (1,4,5,6)-Tetrakisphosphate Biosynthesis | 4.16E+00 | 2.69E-01 | -3.124 |
| D-myo-inositol (3,4,5,6)-tetrakisphosphate Biosynthesis | 4.16E+00 | 2.69E-01 | -3.124 |
| Hepatic Fibrosis Signaling Pathway | 3.67E+00 | 2.20E-01 | -2.038 |
| PAK Signaling | 3.52E+00 | 2.82E-01 | -1.569 |
| PDGF Signaling | 3.32E+00 | 2.99E-01 | -3.138 |
| PTEN Signaling | 3.20E+00 | 2.58E-01 | 1.567 |
| Huntington's Disease Signaling | 3.05E+00 | 2.27E-01 | -0.707 |
| CLEAR Signaling Pathway | 2.93E+00 | 2.24E-01 | 1.134 |
| ERK5 Signaling | 2.87E+00 | 2.97E-01 | -2.4 |
| Regulation Of The Epithelial Mesenchymal Transition By Growth Factors Pathway | 2.65E+00 | 2.34E-01 | -3.703 |
| Axonal Guidance Signaling | 2.55E+00 | 2.01E-01 | NaN |
| Glioma Signaling | 2.55E+00 | 2.54E-01 | -3.13 |
| Sphingosine-1-phosphate Signaling | 2.55E+00 | 2.56E-01 | -1.89 |
| Glioblastoma Multiforme Signaling | 2.55E+00 | 2.38E-01 | -2.535 |
| CDK5 Signaling | 2.43E+00 | 2.54E-01 | -0.408 |
| Thyroid Cancer Signaling | 2.27E+00 | 2.73E-01 | -3.273 |
| Pulmonary Fibrosis Idiopathic Signaling Pathway | 1.90E+00 | 2.02E-01 | -3.15 |
| PEDF Signaling | 1.82E+00 | 2.50E-01 | -2.4 |
| Role of PKR in Interferon Induction and Antiviral Response | 1.77E+00 | 2.27E-01 | -2.414 |
| Natural Killer Cell Signaling | 1.72E+00 | 2.12E-01 | -4.111 |
| Human Embryonic Stem Cell Pluripotency | 1.59E+00 | 2.08E-01 | -2.655 |
| Regulation of the Epithelial-Mesenchymal Transition Pathway | 1.53E+00 | 2.07E-01 | NaN |
| NGF Signaling | 1.41E+00 | 2.18E-01 | -3.674 |
| PD-1, PD-L1 cancer immunotherapy pathway | 1.35E+00 | 2.21E-01 | 3.411 |
| Iron homeostasis signaling pathway | 1.33E+00 | 2.12E-01 | NaN |
| BAG2 Signaling Pathway | 9.55E-01 | 2.10E-01 | 0 |
